# Supplementary material
Source: publisher figshare collection journal article supplement (https://wiley.figshare.com/articles/dataset/_/5614843)
Supplement: Supplementary file 1 [file 1]

Archive with 3 entries (3 files):
- A. phagocytophilum Protocol v.6_SuppInfo_Redacted.pdf
- Questionnaires_Initial Evaluation-v.3_SuppInfo_Redacted.pdf
- Questionnaires_Follow-up-v.3_SuppInfo_Redacted.pdf
